# Supplementary material for: HLA-G 3′UTR Polymorphisms Predict Drug-Induced G3-4 Toxicity Related to Folinic Acid/5-Fluorouracil/Oxaliplatin (FOLFOX4) Chemotherapy in Non-Metastatic Colorectal Cancer
Source: PubMed Central journal article supplement (PMC5535859; doi:10.3390/ijms18071366), 2017-06-27
Supplement: ijms-18-01366-s001.pdf [file ijms-18-01366-s001.pdf]

# Supplementary Material: *HLA-G* polymorphisms predict drug-induced G3-4 toxicity related to FOLFOX chemotherapy in non-metastatic CRC

Marica Garziera<sup>1\*</sup>, Saverio Virdone<sup>2</sup>, Elena De Mattia<sup>1</sup>, Lucia Scarabel<sup>1</sup>, Erika Cecchin<sup>1</sup>, Jerry Polesel<sup>2</sup>, Mario D'Andrea<sup>3</sup>, Nicoletta Pella<sup>4</sup>, Angela Buonadonna<sup>5</sup>, Adolfo Favaretto<sup>6</sup>, Giuseppe Toffoli<sup>1</sup>

**Table S1.** Haplotype numbers and frequencies observed at *HLA-G* 3'UTR polymorphic sites in 144 eligible patients with stage II-III CRC

| <i>HLA-G</i> 3'UTR Haplotypes <sup>a</sup> | CRC (2n=288) | Frequency |
|--------------------------------------------|--------------|-----------|
| UTR-1                                      |              |           |
| DelTGCCCGC                                 | 72           | 0.250     |
| UTR-2                                      |              |           |
| InsTCCCGAG                                 | 103          | 0.358     |
| UTR-3                                      |              |           |
| DelTCCCGAC                                 | 41           | 0.142     |
| UTR-4                                      |              |           |
| DelCGCCCAC                                 | 27           | 0.094     |
| UTR-5                                      |              |           |
| InsTCCTGAC                                 | 11           | 0.037     |
| UTR-6/UTR-18                               |              |           |
| DelTGCCCAC                                 | 9            | 0.031     |
| UTR-7                                      |              |           |
| InsTCATGAC                                 | 17           | 0.059     |
| UTR-10                                     |              |           |
| DelTCCCGAG                                 | 1            | 0.004     |
| UTR-15                                     |              |           |
| InsTCCCGAC                                 | 3            | 0.010     |
| UTR-38                                     |              |           |
| DelTCCCGGC                                 | 1            | 0.004     |
| UTR-new1?                                  |              |           |
| DelTCCTGAG                                 | 2            | 0.007     |
| UTR-new2?                                  |              |           |
| DelTCCCAC                                  | 1            | 0.004     |

<sup>a</sup>*HLA-G* 3'UTR haplotypes were reconstructed with the PHASE method, according to worldwide distributions previously reported [49,50].

**Table S2.** Allele and genotype frequencies for *HLA-G* 3'UTR polymorphisms in 144 eligible patients with stage II-III CRC

| Polymorphisms     | n (%)      | RefSeq <sup>a</sup> | % EUR MAF <sup>b</sup> (Minor allele) |
|-------------------|------------|---------------------|---------------------------------------|
| +2960 14-bp INDEL |            | rs371194629         | 37 (Ins)                              |
| Del               | 154 (53.5) |                     |                                       |
| Ins               | 134 (46.5) |                     |                                       |
| Del/Del           | 41 (28.5)  |                     |                                       |
| Del/Ins           | 72 (50.0)  |                     |                                       |
| Ins/Ins           | 31 (21.5)  |                     |                                       |
| +3003 T>C         |            | rs1707              | 15 (C)                                |
| T                 | 261 (90.6) |                     |                                       |
| C                 | 27 (9.4)   |                     |                                       |
| T/T               | 119 (82.6) |                     |                                       |
| T/C               | 23 (16.0)  |                     |                                       |
| C/C               | 2 (1.4)    |                     |                                       |
| +3010 C>G         |            | rs1710              | 46 (C)                                |
| C                 | 180 (62.5) |                     |                                       |
| G                 | 108 (37.5) |                     |                                       |
| C/C               | 53 (36.8)  |                     |                                       |
| G/C               | 74 (51.4)  |                     |                                       |
| G/G               | 17 (11.8)  |                     |                                       |
| +3027 C>A         |            | rs17179101          | 6 (A)                                 |
| C                 | 271 (94.1) |                     |                                       |
| A                 | 17 (5.9)   |                     |                                       |
| C/C               | 128 (88.9) |                     |                                       |
| C/A               | 15 (10.4)  |                     |                                       |
| A/A               | 1 (0.7)    |                     |                                       |
| +3035 C>T         |            | rs17179108          | 9 (T)                                 |
| C                 | 258 (89.6) |                     |                                       |
| T                 | 30 (10.4)  |                     |                                       |
| C/C               | 115 (79.9) |                     |                                       |
| C/T               | 28 (19.5)  |                     |                                       |
| T/T               | 1 (0.7)    |                     |                                       |
| +3142 G>C         |            | rs1063320           | 46 (G)                                |
| G                 | 179 (62.2) |                     |                                       |
| C                 | 109 (37.9) |                     |                                       |
| G/G               | 53 (36.8)  |                     |                                       |
| G/C               | 73 (50.7)  |                     |                                       |
| C/C               | 18 (12.5)  |                     |                                       |
| +3187 A>G         |            | rs9380142           | 34 (G)                                |
| A                 | 215 (74.7) |                     |                                       |
| G                 | 73 (25.4)  |                     |                                       |
| A/A               | 79 (54.9)  |                     |                                       |
| A/G               | 57 (39.6)  |                     |                                       |
| G/G               | 8 (5.6)    |                     |                                       |
| +3196 C>G         |            | rs1610696           | 28 (G)                                |
| C                 | 182 (63.2) |                     |                                       |
| G                 | 106 (36.8) |                     |                                       |
| C/C               | 56 (38.9)  |                     |                                       |
| C/G               | 70 (48.6)  |                     |                                       |
| G/G               | 18 (12.5)  |                     |                                       |
| +3227 G>A         |            | rs1233331           | 4 (A)                                 |
| G                 | 283 (98.3) |                     |                                       |
| A                 | 5 (1.7)    |                     |                                       |
| G/G               | 139 (96.5) |                     |                                       |
| G/A               | 5 (3.5)    |                     |                                       |
| A/A               | 0          |                     |                                       |

MAF: Minor Allele Frequency; <sup>a</sup>Reference Sequence number for each nucleotide variation is reported in common databases (<http://www.1000genomes.org/1000-genomes-browsers> and <http://www.ncbi.nlm.nih.gov/snp>); <sup>b</sup>MAF is reported in the following Caucasian EUR (European) sub-populations, updated 31/01/2017: CEU (Utah residents with Northern and Western European ancestry, N=99), FIN (Finnish subjects in Finland, N=99), GBR (British subjects in England and Scotland, N=91), IBS (Iberian subjects in Spain, N=107), and TSI (Toscani subjects in Italy, N=107).
